# Psychiatric Services

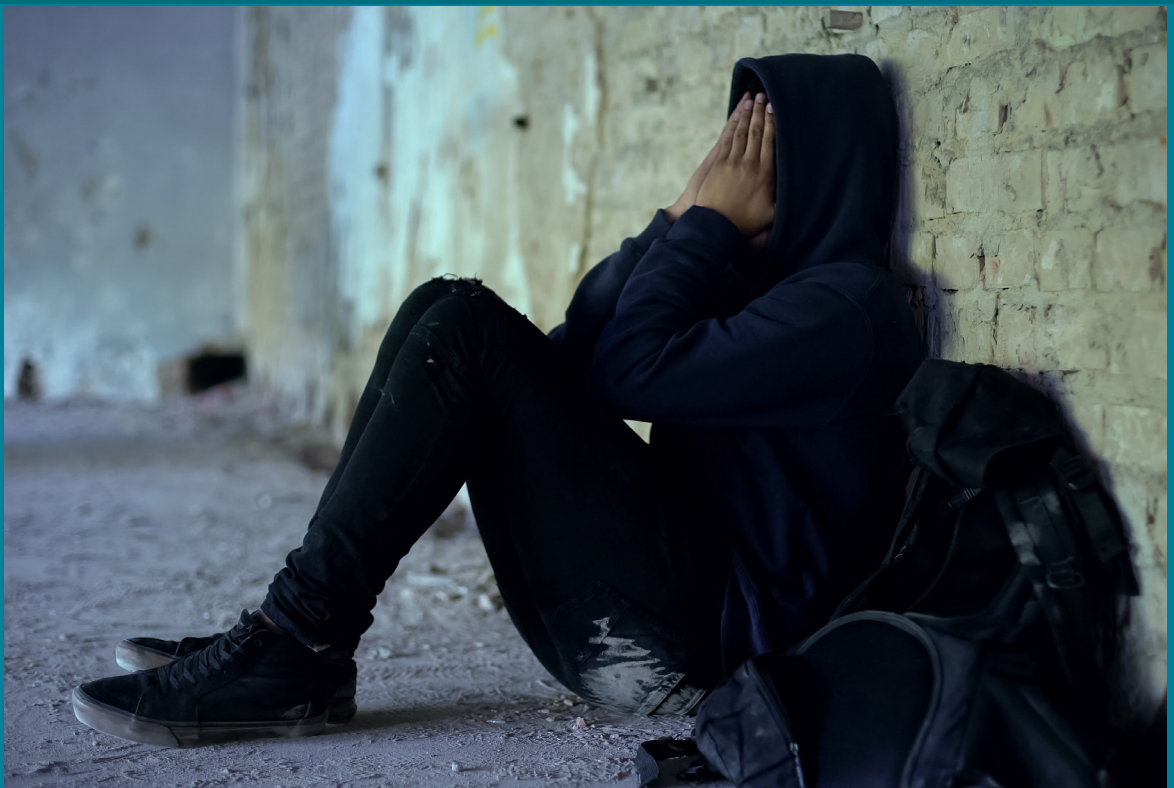

Safety net services and policy priorities for youths

Evaluating police–mental health co-response versus traditional police response

Well-being of health care professionals treating opioid use disorders during the pandemic

Ending restrictive housing in prisons for people with mental disorders
